# Supplementary material
Source: PubMed Central journal article supplement (PMC8721774)
Supplement: sj-pdf-1-jcb-10.1177_0271678X211026770.pdf [file sj-pdf-1-jcb-10.1177_0271678X211026770.pdf]

## **Supplementary Materials**

### **Animals and MCAO model**

Adult male C57BL/6J mice, aged 60-70 days and weighing 20-25g, were bought from the Beijing Vital River Company. All animals were reared in a no pathogenic environment at standard temperature (22–24 °C) with a 12-hour light/dark cycle. The mice were assigned blindly and randomly treated with either MCAO or Sham surgeries. In brief, mice were anesthetized with chloral hydrate (30 mg/kg) intraperitoneally, and the body temperature of which should be kept at  $37.0 \pm 0.5$  °C with incubator throughout the operation. First, the mice were fixed at supine position and the skin was incised along the center of the neckline. Then, the exposed left common carotid artery, external carotid artery and internal carotid artery were ligated separately. A 6-0 silicon rubber-coated monofilament (Doccol, 602256PK5Re) was slowly inserted into the internal carotid artery until the middle cerebral artery was completely obstructed. The left middle cerebral artery was blocked for 60 min to induce transient focal cerebral ischemia. Afterwards, the filament was withdrawn to restore cerebral blood flow (CBF). The laser speckle flowmetry (PeriCam PSI, Stockholm Sweden) was used to monitor the dynamic change of the regional CBF. The successful MCAO model was featured with a cliff-like drop upon insertion of the monofilament and used in subsequent experiments. In the Sham group, mice were treated with the identical surgical process, in which the middle cerebral artery was not occluded. Finally, the mice recovered from the surgery and were kept in the normal condition. All experimental procedures were approved by the Animal Ethics Committee of Tianjin Medical University General Hospital.

### **Tissue dissociation for 10x Genomics**

A total of six male C57BL/6J mice from MCAO and sham groups (three for each group) were used to perform scRNA-seq. After 24 h ischemia-reperfusion, mice were anesthetized, fixed and perfused with ice-cold PBS to remove the blood. The ischemic hemisphere (MCAO ipsilateral brain) and the ipsilateral hemisphere (Sham ipsilateral brain) were immediately dissected and minced using a scalpel for digestion with papain (Worthington, Biochemical Corporation, USA) for 30 minutes at 37°C. The minced brain tissues were triturated gently 4 times with a 10 ml pipette during the incubation process. After incubation, the mixture was centrifuged at 300g for 5 minutes at RT. Then discard the supernatants and resuspend cell pellets in DNase dilute albumin-inhibitor solution. After that, the suspended single cells were passed through a pre-wet (with HBSS) 40 µm cell strainer and centrifuged at 300g for 5 min at 4°C. And then resuspend cell pellets in 10 ml of 30% Percoll in PBS, and which were centrifuged at 700 g for 10 min. After the myelin debris fraction floating on the surface was removed, the pelleted cells were immediately resuspended with FACS buffer (PBS, 1% BSA). Live/dead discrimination reagents for flow cytometry were prepared using Zombie NIR Fixable Viability Kit (BioLegend). BD FACS Aria II sorter was used for FACS sorting. Cells were sorted into the catching medium (0.04% BSA in PBS). The single cell samples were counted by Countess™ II Automated Cell Counter using a hemocytometer with trypan blue. The cell viability was above 80%, and cells were loaded onto a 10x Genomics Chromium chip according to the manufacturer's instructions.

### **Single cell cDNA library preparation and sequencing**

Single Cell 3' Library was constructed mainly following Chromium Single Cell 3' Reagent Kits User Guide (v2 Chemistry). Briefly, the gel bead emulsion (GEM) was generated from the mixture of single cell suspension, gel beads and oils via the 10x Genomics chromium controller. Since droplet formation, samples were added into PCR tubes, and reverse transcription was fulfilled via a T100 Thermal Cycler (Bio-Rad) as follows: incubation at 53°C for 45 minutes, 85°C for 5 minutes and then held at 4°C. The cDNA was generated, amplified, and then subjected to quality assessment using an Agilent Bioanalyzer 2100. The library construction was performed by

adding the P5 primer, Read 2 (primer site for sequencing read 2), Sample Index and P7 primer, respectively. The resulting library was quality controlled and then sequenced by Illumina HiSeq4000 PE125.

### **Quality control analysis of scRNA-seq datasets**

The single-cell RNA sequencing data was further analyzed by using the 10x Cell Ranger (version 2.2.0, <https://support.10xgenomics.com/single-cell-gene-expression/software/pipelines/latest/what-is-cell-ranger>). Briefly, FASTQ files were generated by demultiplexing the Illumina sequencer's base call files (BCLs), and then alignment, filtering, barcode and UMI counting were processed. STAR (Spliced Transcripts Alignment to a Reference) was utilized to perform the read alignments to mouse reference transcriptome (mm10). Cell Ranger was employed to conduct primary quality control (QC) on the FASTQ files to generate high quality data. Finally, we recovered 58,528 cells with a median UMI count of 2,610 per cell, a mean read depth of 92,207 reads per cell, and a median of 1,295 genes per cell. Cellranger aggr pipeline was used to combine the data from the sham and MCAO samples for direct comparison and analysis. Seurat is a popular R package that can perform QC following criteria as below: 1) cells were sequenced according to the number of genes from small to large, and select the top 99%; 2) the gene counts > 200; 3) cells with mitochondrial gene expression ratio ≤ 25%. Then, the filtered gene barcode matrices were processed for dimensionality reduction, clustering, and visualization.

### **Single-cell RNA-seq data analysis**

The PCA (principal component analysis) was carried out using the Seurat R Package to identify the first 10 principal components in the feature-barcode matrices for dimensionality reduction. Next, the t-SNE (t-distributed stochastic neighbor embedding), and the UMAP algorithm were used for visualization of the reduced data in two-dimensional space and expression similarity analysis, respectively. The visualization of data was performed by Loupe Cell Browser Software (v3.1.0) and Seurat for clustering, heatmap generation, and differential gene expression analysis.

### **Differential expression analysis and cell type identification**

In order to identify DEGs within each cluster, the Seurat function FindAllMarkers() was employed to find, for each cluster, genes that are more highly expressed in that cluster relative to the rest of the clusters. The Log2 fold-change (L2FC) was used as an estimate of the log2 ratio of mean gene expression in a cluster to that in all other clusters and cells, based on a negative binomial test. The p-value of the output data reported here had been adjusted for multiple testing using the Benjamini-Hochberg procedure. Cell type annotation was identified mainly based on the marker genes from previous studies and the CellMarker database. The sample dates of cells were assigned to marker genes within each cell type for validating the cell type assignments.

### **Gene enrichment and pathway analysis**

The absolute log2FC > 0.5 and P < 0.05 were set as a threshold for significantly DEGs. In this study, we conducted the following differential expression comparisons: (1) the DEGs between one cell type and the remaining cell types for identifying cell-type marker genes; (2) the DEGs between MCAO and sham control samples for identifying disease associated changes at the cell type level; (3) the DEGs between one subcluster of a given cell type and the remaining subclusters of the same cell type for determining subcluster specific genes. All these DEGs mentioned above served as input for gene enrichment analysis via Metascape (<https://metascape.org>), a web-based bioinformatics portal for gene annotation and analysis resource that especially supports meta-analysis of multiple gene lists. To perform gene enrichment analysis, we first identified all statistically enriched terms (GO Biological Processes, KEGG Pathway and Reactome Gene Sets), and calculated accumulative hypergeometric p-values and enrichment factors for filtering. Then, we performed

hierarchical clustering using the significant terms into a tree according to Kappa-statistical similarities among their gene patterns, and the tree was casted into term clusters upon the threshold (0.3 kappa score). Given that Circos plot is a more intuitive and scalable presentation compared to a Venn diagram; we used the former to display the overlap among the gene lists. Different genes were linked in the network if they shared the same ontology term, which was significantly enriched in both input gene lists. To avoid linked genes based on very general annotation, functional overlaps were calculated relying on ontology terms that contain less than 100 genes. For cell-type specific DEGs between MCAO and sham groups, we conducted the enrichment analysis using the online resources Enrichr (<http://amp.pharm.mssm.edu/Enrichr/>), WebGestalt (<http://www.webgestalt.org>) and PANTHER (Protein Analysis Through Evolutionary Relationships, <http://pantherdb.org>).

### **Single-cell regulatory network inference and clustering (SCENIC) analysis**

SCENIC is an algorithm for simultaneously reconstructing gene regulatory networks and identifying stable cell states from single-cell RNA-seq data. Gene regulatory networks were inferred according to co-expression and DNA motif prediction, and then network activity was evaluated in each cell to identify cell status. SCENIC analysis was conducted on each cell type according to the pySCENIC tutorial. SCENIC simultaneously reconstructs gene regulatory networks from single-cell RNA sequencing data. First, SCENIC identifies potential TF targets according to coexpression. TF motif enrichment analysis was then performed to recognize the direct targets (regulons) and assess the activity of the regulons (AUCell score).

### **Trajectory Analysis**

The genes of Mon/M $\phi$  were input for trajectory analysis via the Monocle2 R package (version 2.14.0, <https://bioconductor.org/packages/release/bioc/html/monocle.html>), and dimensionality reduction was conducted by applying DDRTree method with default parameters. The branch expression analysis modeling (BEAM) implemented in Monocle 2 was employed to identify specific genes that are enriched along particular branches in the pseudotime tree. Branched heatmaps were created with the significant branch-specific expression genes ( $q$  value  $< 5 \times 10^{-5}$ ). The orderCells function was analyzed by using the root state argument to specify the homeostatic Mon/M $\phi$  branch as the start point of the trajectory.

### **Cellular interactions analysis**

Molecular interactions between the cells were identified by the recently developed CellPhoneDB. Normalized and filtered scRNA-seq data with the clusters previously identified by Seurat were used for CellPhoneDB analysis. Since the current CellPhoneDB release only accepts human ensembl IDs as input, murine ensembl IDs were converted to human ensembl IDs using biomaRt. The ligand-receptor pair was included in the analysis only when the percentage of cells expressing the receptor and ligand genes exceeded 30%. For the polymeric complexes, the expression value of the subunit with lower average expression was selected as the expression of the receptor for following statistical analysis. Besides, this software could identify the cell type-specific ligand-receptor interactions according to their priority. Then, pair comparisons were performed between all cell types in the data set. First, the cell type markers of all cells were randomly arranged 1000 times to form a new cell cluster, and the average expression level of the ligand in the randomly arranged cell cluster and the average expression level of the receptor in the interacting cell clusters were calculated. Finally, a zero distribution is generated for each ligand-receptor pair in each pair comparison between the two clusters. The actual mean value of the ligand-receptor pair between the two clusters was calculated, and the likely significant P value of the receptor-ligand pair in the two clusters was estimated according to the proportion of the calculated mean equal to or higher than the actual mean value.

### **Immunofluorescence Staining**

The rodent brain was removed and fixed in 4% PFA overnight. The brain sections were permeabilized with 0.3% Triton X-100 for 10 min, and then washed and blocked with 3% BSA (bovine serum albumin) for 1h at RT. Then the tissue sections were incubated with the primary antibodies including goat anti-Iba-1 (1:800, Abcam), rabbit anti-TMEM119(1:300, Abcam), mouse anti-CXCL10 (1:50, Abcam), mouse anti-APC(1:100, Millipore), rabbit anti-GPD1(1:500, Biorbyt), goat anti-CD72(1:100, R&D Systems), rat anti-CCL11(1:100, R&D Systems), goat anti-CD13(1:20, R&D Systems), Armenian Hamster anti-CCL2(1:100, eBioscience), rat anti-LGALS3(1:100, eBioscience), FITC-linked rabbit anti-LILRB4(1:100, MyBioSource), Alexa Fluor® 594 anti-CD8a (1:150, Biolegend), rabbit anti-Iba-1 (1:1000, Wako), goat anti-OPN(1:20, R&D Systems), mouse anti-EP4 (C-4)(1:250, Santa Cruz Biotechnology) at 4°C overnight. After primary incubation, the brain sections were washed with cold PBS, and then incubated with the secondary fluorescent-conjugated antibodies: Alexa Fluor 546-conjugated donkey anti-mouse, Alexa Fluor 546-conjugated donkey anti-goat, Alexa Fluor 546-conjugated donkey anti-rabbit, Alexa Fluor 546-conjugated goat anti-rat, Alexa Fluor 647-conjugated donkey anti-rabbit, Alexa Fluor 647-conjugated donkey anti-goat, Alexa Fluor 594-conjugated donkey anti-mouse, Alexa Fluor 488-conjugated goat anti-Armenian Hamster, Alexa Fluor 488-conjugated donkey anti-rabbit, Alexa Fluor 488-conjugated donkey anti-goat(1:1000, Invitrogen) at room temperature for 1 h. The sections were then washed with PBS and applied coverslip with DAPI - Aqueous, Fluoroshield(104139, Abcam). Immunostaining was observed with EVOS FL Auto Imaging System (Thermo Fisher Scientific), Mantra System (PerkinElmer) and LSM 900 with Airyscan 2(ZEISS).

### **Flow Cytometry Staining**

Brain single cell suspensions were prepared as described above. Aliquot up to  $1 \times 10^6$  cells/100  $\mu$ L into FACS tubes. Block Fc receptors by pre-incubating cells with TruStain FcX™ (anti-mouse CD16/32) antibody (Biolegend) for 10 minutes on ice. Add appropriately conjugated fluorescent, or purified primary antibodies at proper concentrations and incubate at 4°C for 25 minutes in the dark. Then, washed cells with PBS twice. For intracellular staining, cells were fixed in fixation buffer in the dark for 20 minutes at RT after cell surface antigen staining. After washing twice in Intracellular Staining Perm Wash Buffer, cells were incubated with antibodies in the residual Intracellular Staining Perm Wash Buffer for 20 minutes in the dark at RT. Then, cells were washed twice with Intracellular Staining Perm Wash Buffer and centrifuge at 350 g for 5 minutes. Finally, the fixed and intracellularly labeled cells were resuspended in 500  $\mu$ L PBS and analyzed with the FMO controls to identify gating boundaries. The antibodies used were as following list: (CD45, CD11b, CD31, CD85k (gp49 Receptor), MCP-1, Ly6C, Ly6G, I-A/I-E, Biolegend), (CD13, CD72, BD Biosciences), (Neun, IP10, Abcam), (CD177, O4, CCL11, R&D Systems), (EAAT1/GLAST/SLC1A3, Novus Biologicals), (GPD1, Origene), (IFITM1, GRO beta, PAE Receptor, Biorbyt). Data were obtained from FACS Aria III (BD Biosciences), and analyzed using FlowJo 10.

### **Statistical analysis**

All statistical analysis was described in the figure legends and data are presented as mean $\pm$ SD. Shapiro-Wilk test was applied for the evaluation of normality for each set of data compared. The two-tailed unpaired Student's t-test was used for comparisons between two groups.  $P < 0.05$  were usually considered to be statistical significance. All statistical analyses were performed using GraphPad Prism 8.0 software.



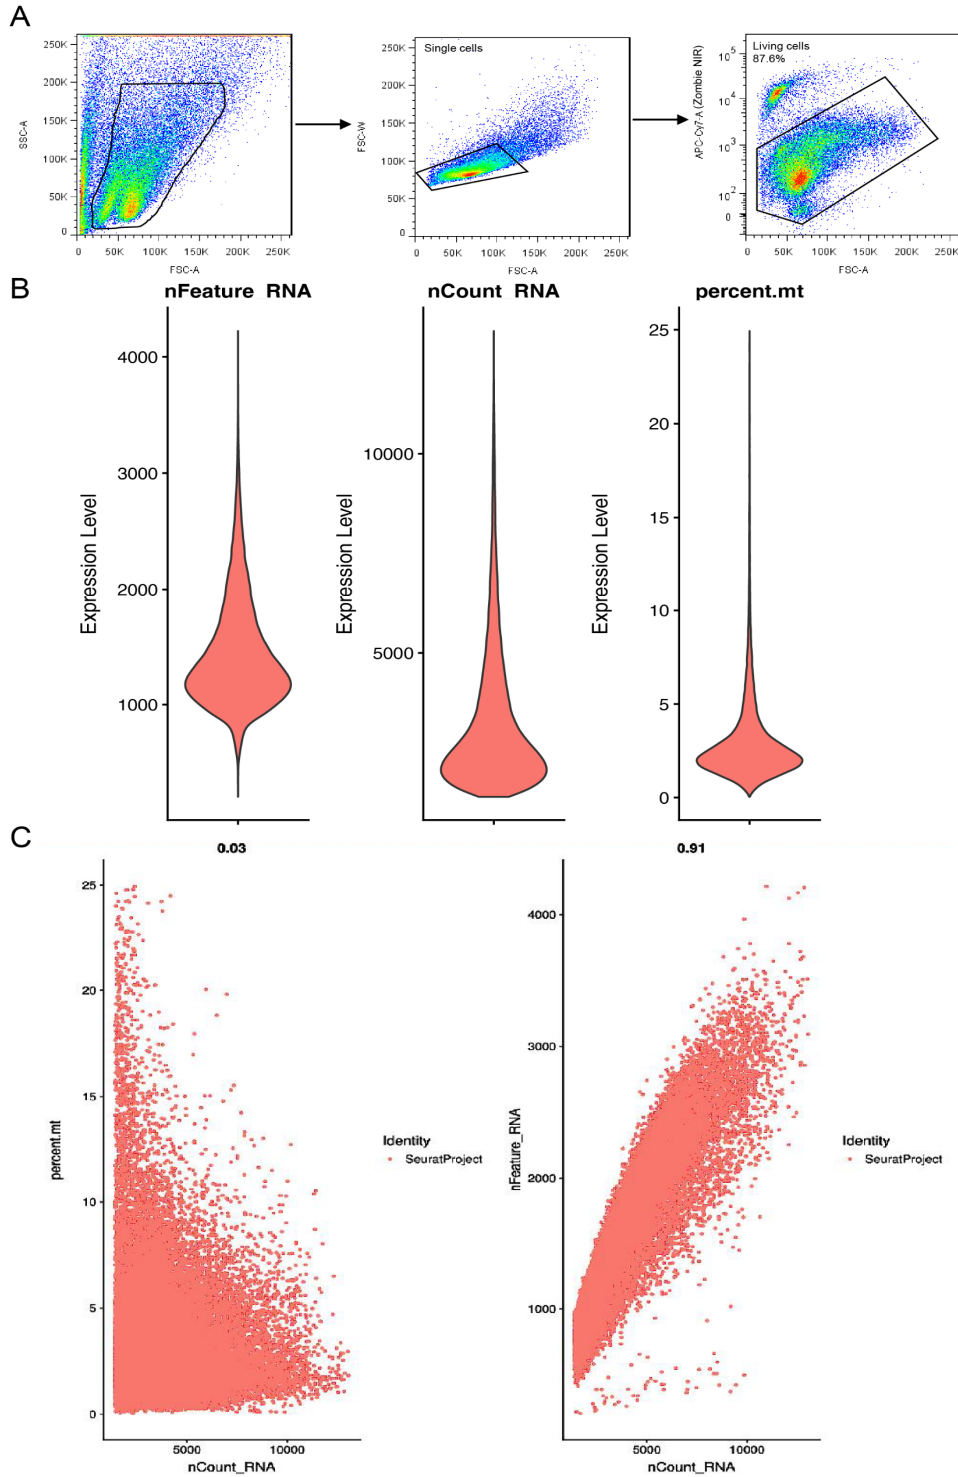

**Fig. S1. Quality controls for single cell RNA sequencing. (A)**FACS gating strategy for the sorting of living and single cells. **(B)**Number of genes per cell, unique molecular identifier (UMI) counts for single cells and percentage of mitochondrial genes. **(C)** The percentage of mitochondrial genes/all UMI counts per cell and the relation between the total number of genes per cell and UMI counts.

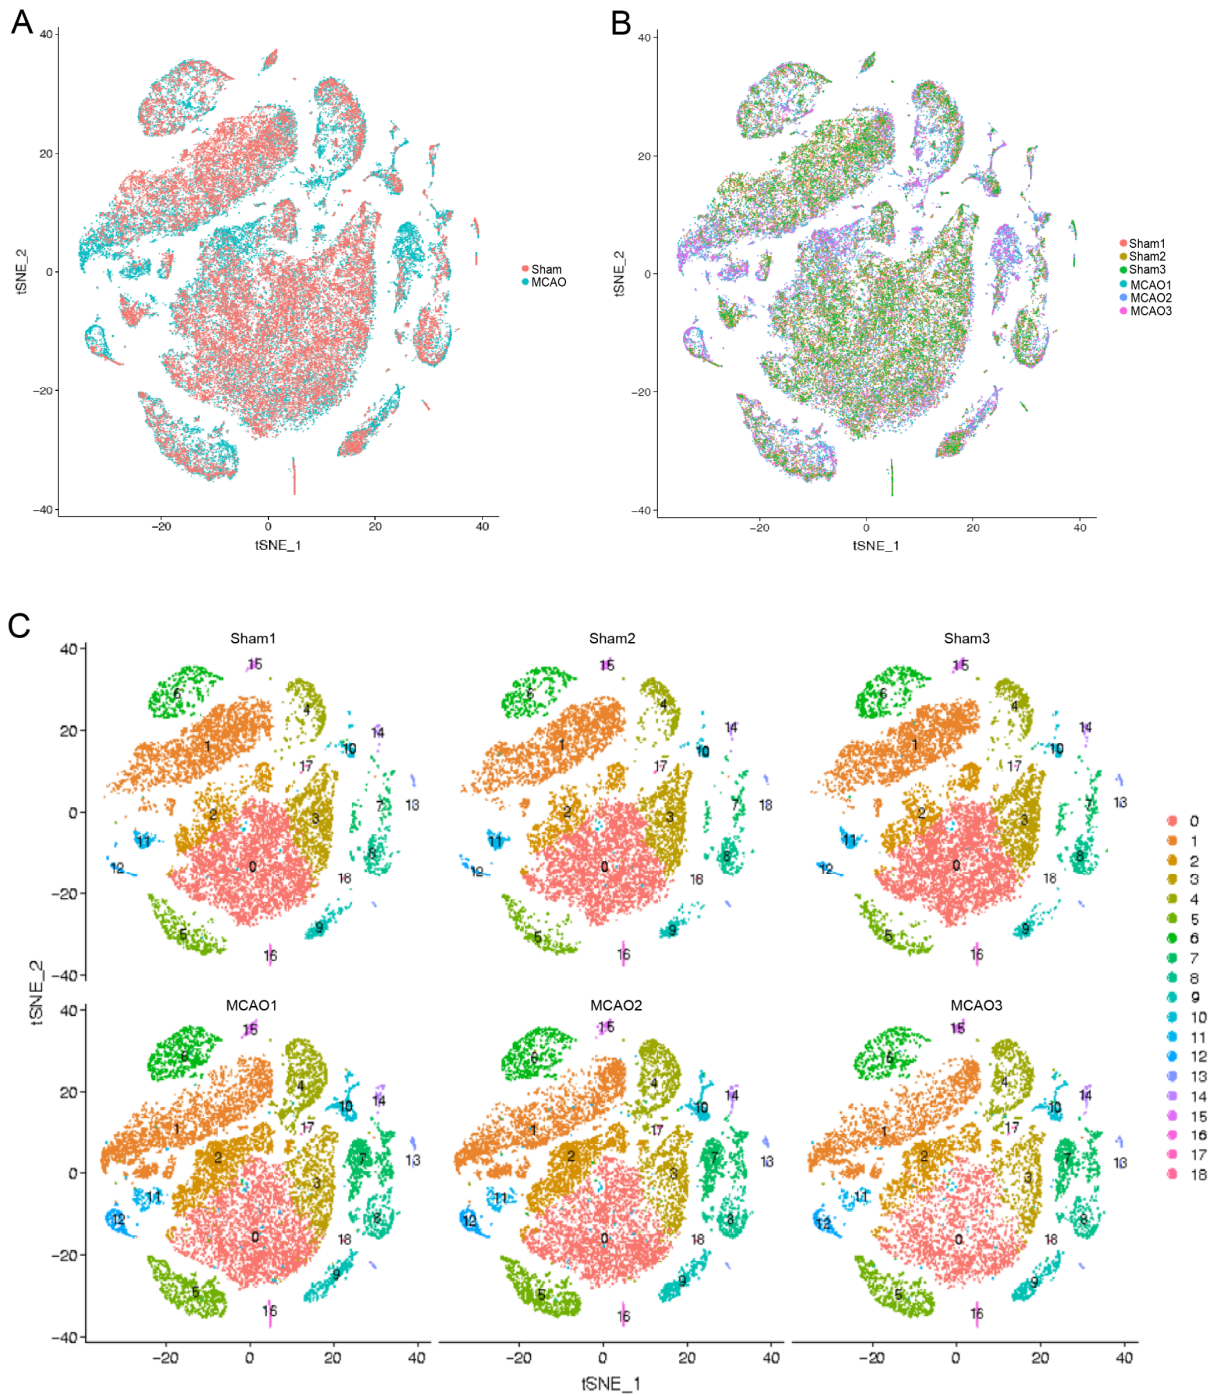

**Fig. S2. Clustering of brain cells of Sham and MCAO Mouse Model. (A-C)** t-SNE plot showing the distribution of 58,528 cells in a merged dataset from the disease groups(A), merged samples (B) and separated samples (C).

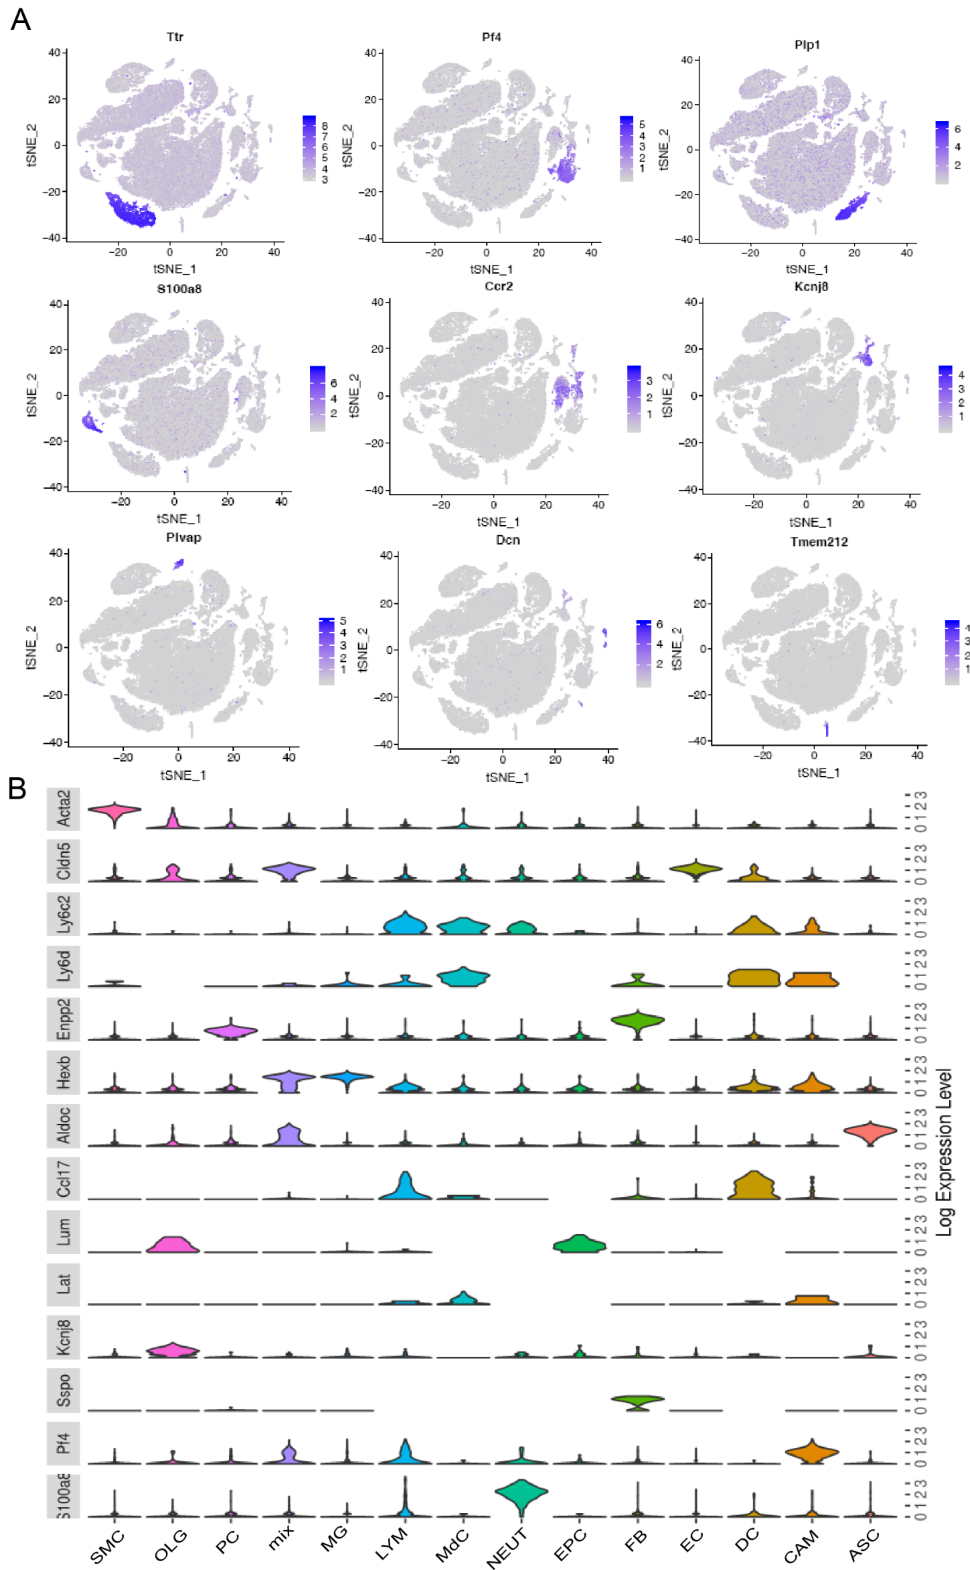

**Fig. S3. Classification among cell clusters with marker genes. (A)**t-SNE plots showing expression patterns of marker genes in various clusters in aligned data on single cells extracted from the brains of MCAO and Sham mice 24 hours after ischemia reperfusion. Scale in Log expression. **(B)** Violin plots showing the expression of top cell-type specific marker genes in each cluster. Cells were collected from mice in Sham and MCAO groups (three mice for each group).

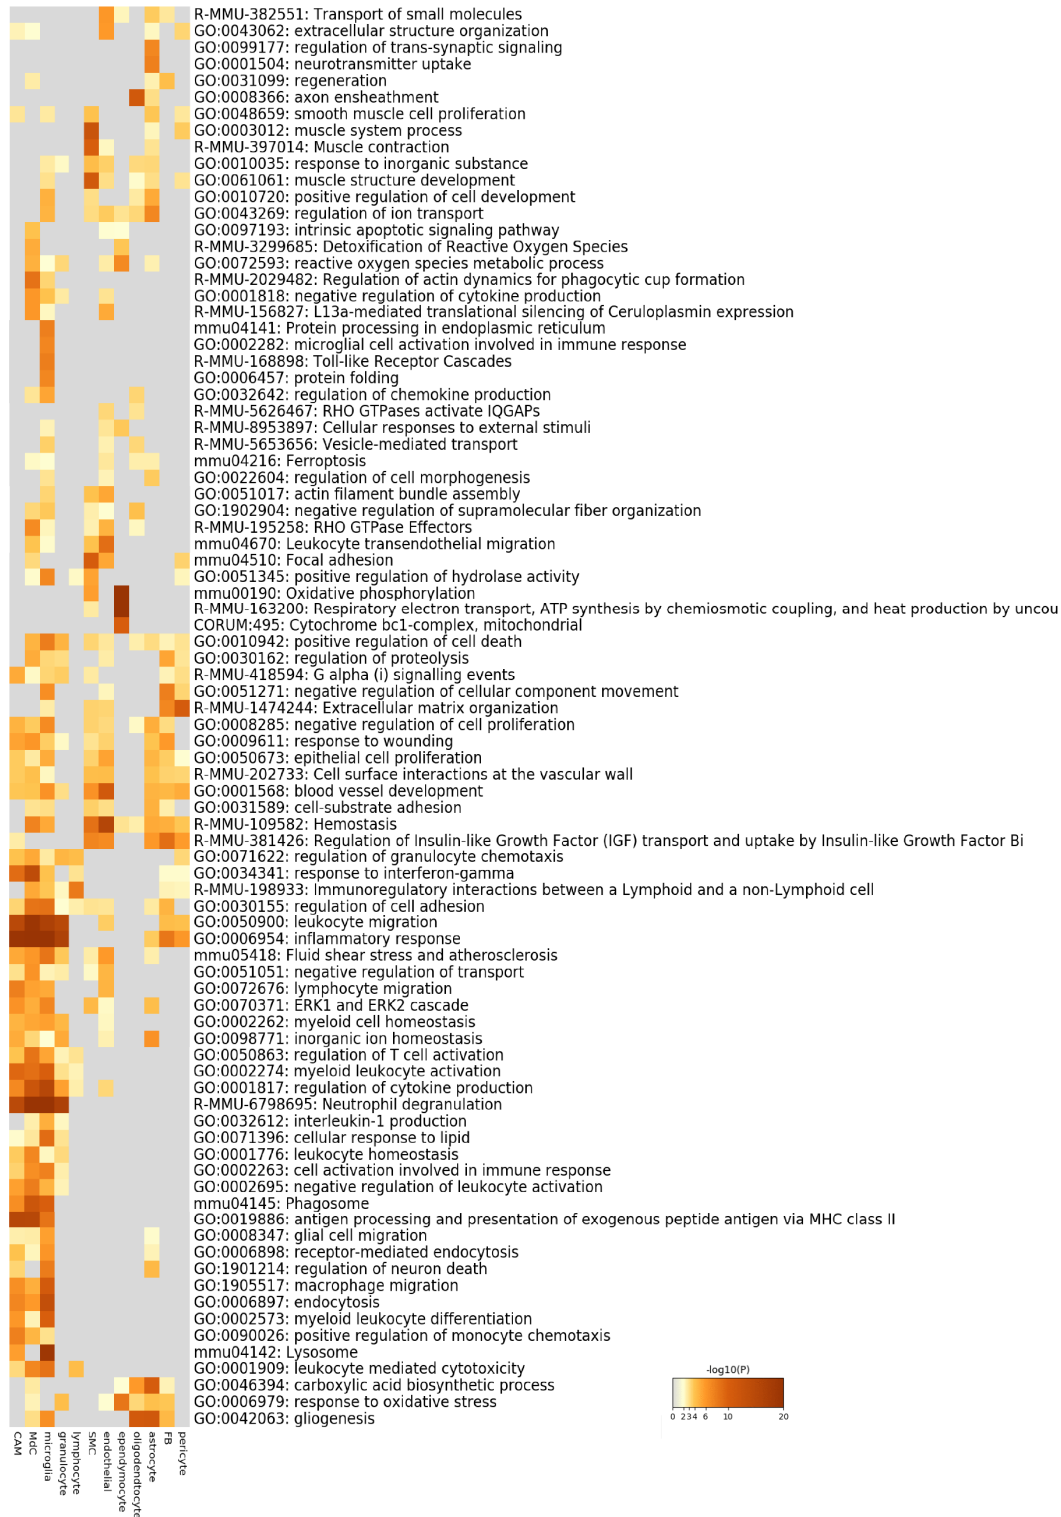

**Fig. S4. Heatmap showing the top enriched terms of marker genes for each cell type.** The discrete color scale indicates statistical significance. The color key from gray to brown represents high to low P-value, respectively. Gray color indicates a lack of significance.

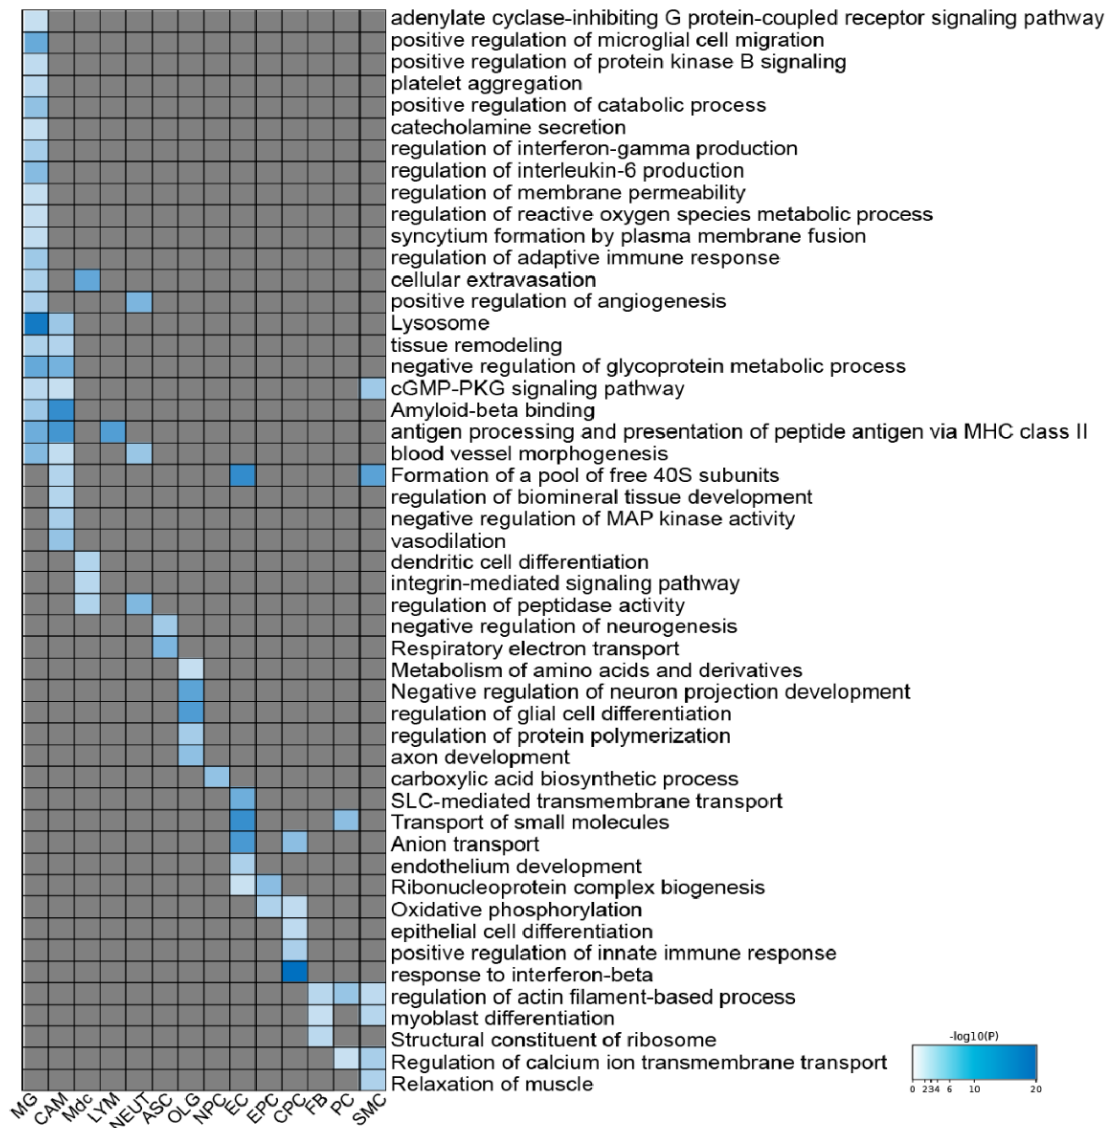

**Fig. S5. The pathway and biological process analyses between MCAO and sham group for each cell type cluster.** Blue color indicates downregulation. Gray indicates no significant change.



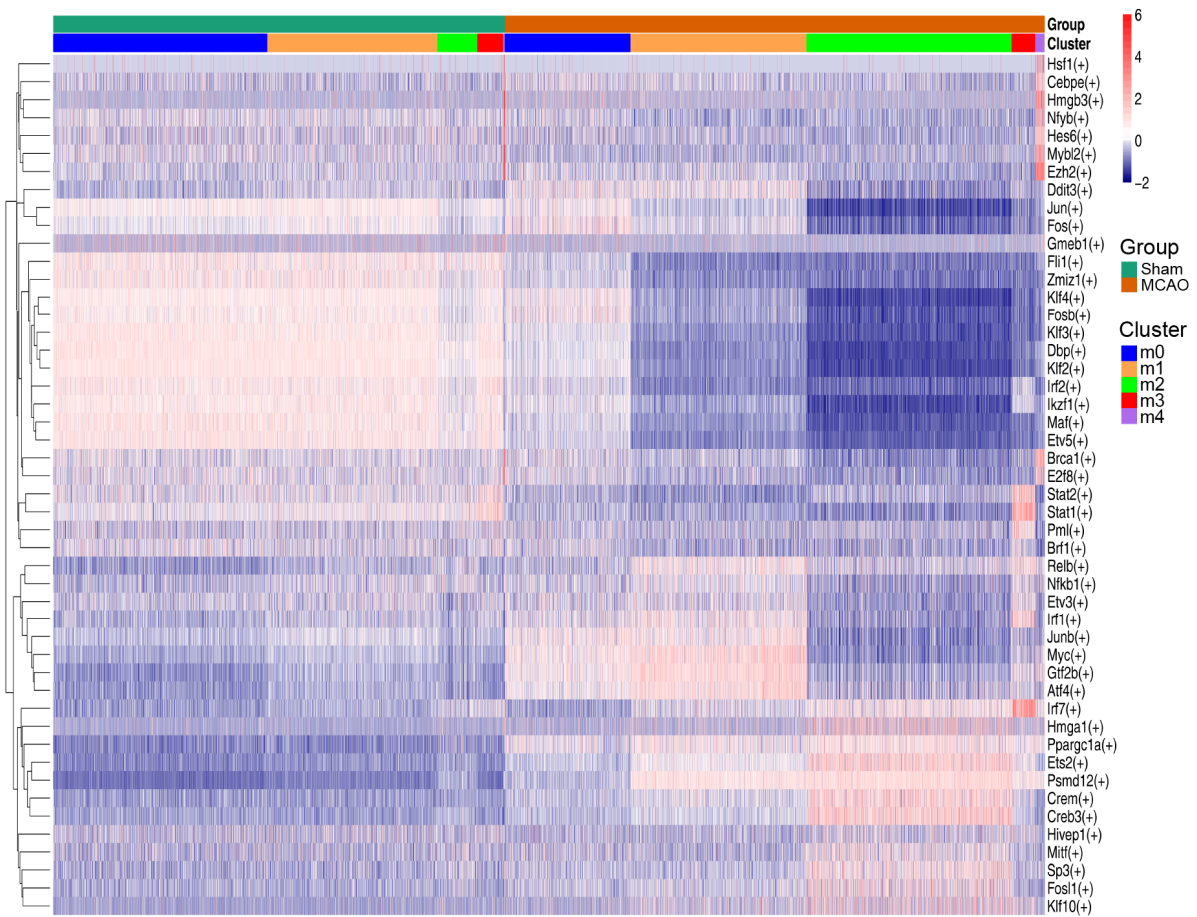

**Fig. S6.** Heatmap of the average area under the curve (AUC) scores for the expression of genes regulated by TFs (transcription factors), as measured in SCENIC, in five microglia subclusters. The top 10 TFs between subclusters in expression regulation estimates was shown.

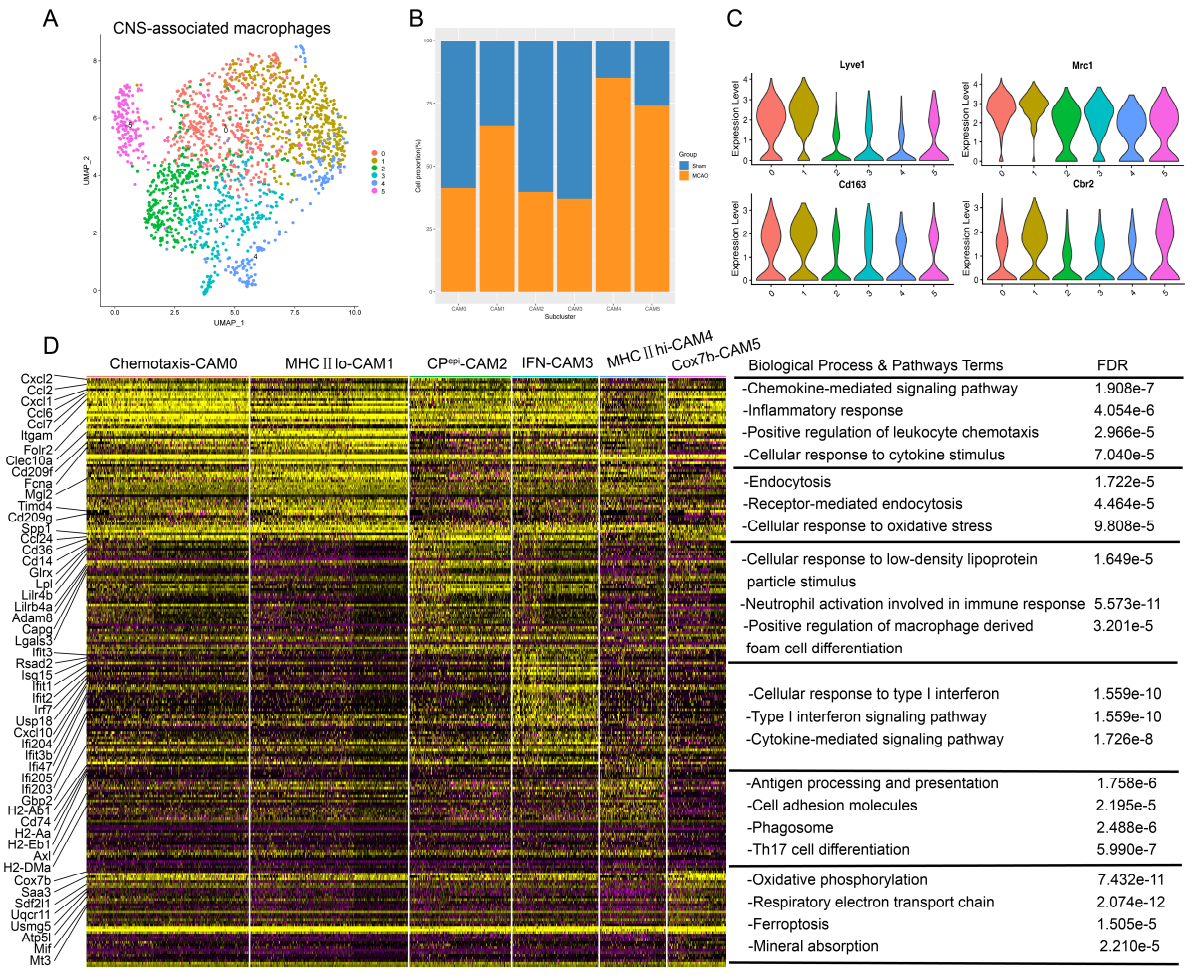

**Fig. S7. The ischemic injury-associated changes in CNS-associated macrophages. (A)** UMAP of CNS-associated macrophages (CAMs) isolated from the sham and MCAO at 24h after reperfusion clustering analysis. **(B)** The percentage change tendency of each CAMs cluster during the progression of MCAO. **(C)** Violin plot showing the expression levels of known core signature genes for each subtype of CAMs. **(D)** Heatmap of differentially expressed genes between CAMs populations with representative significant GO Biological Process and Pathway terms.

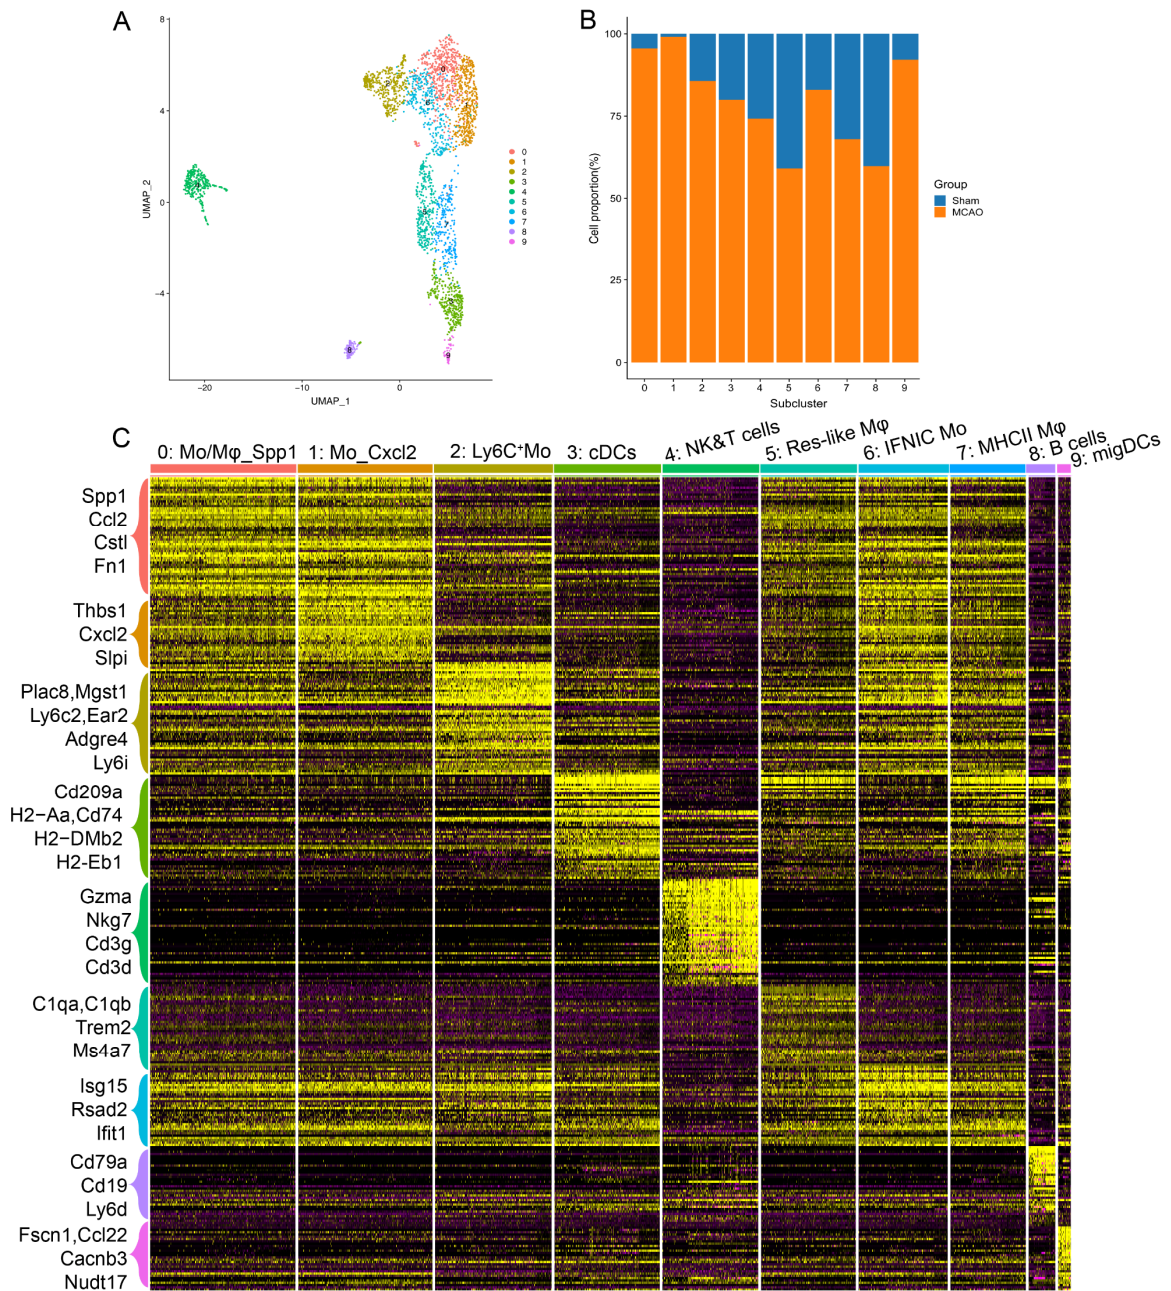

**Fig. S8. Differential gene expression patterns in main circulating immune cells clusters. (A)** UMAP visualization of subclusters of the main immune cells including monocytes/macrophages, DCs, lymphocytes. **(B)** The bar graph showing the fraction of the main immune cells subclusters originating from disease state. **(C)** Heatmap showing single-cell gene expression of the main immune cells subcluster-specific genes.



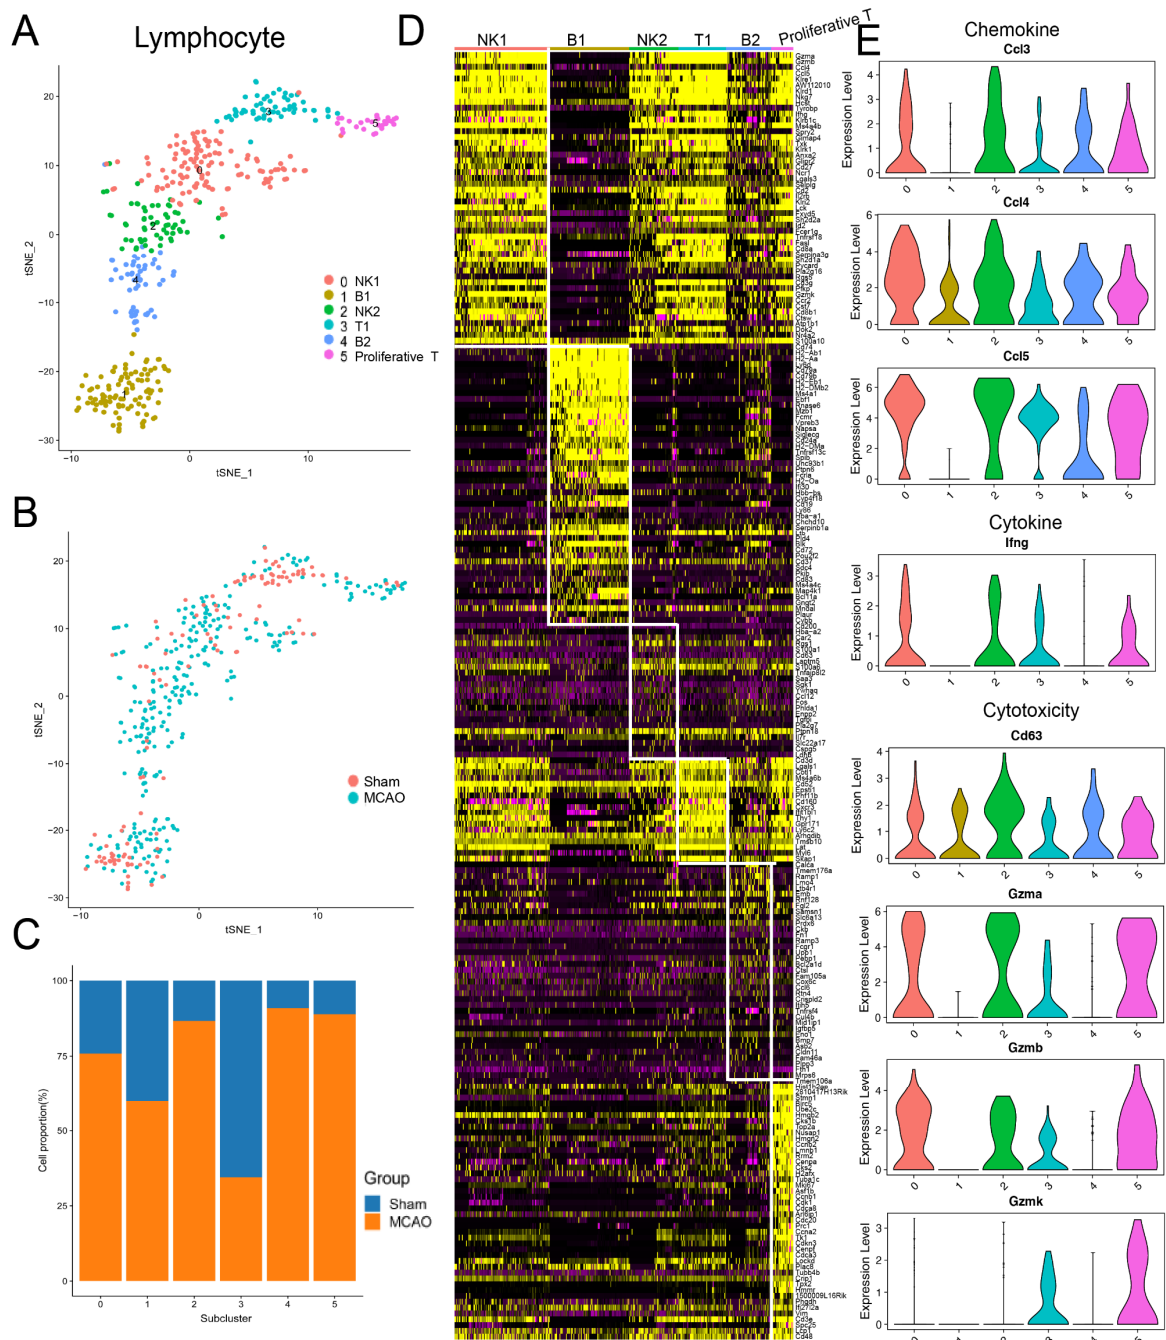

**Fig. S9. Lymphocytes sub-clustering analysis upon ischemic injury.**

(A, B) t-SNE plots showing the distribution of each subtype of lymphocytes(A) and the disease origin of each individual cell(B). (C) Bar graphs representing proportion of lymphocytes subtypes within each disease group. (D) Heatmap representing gene expression characteristics of the subtypes of lymphocytes (E) Violin plots of genes encoding chemokine production, cytokine production and cytotoxicity in lymphocytes subsets.

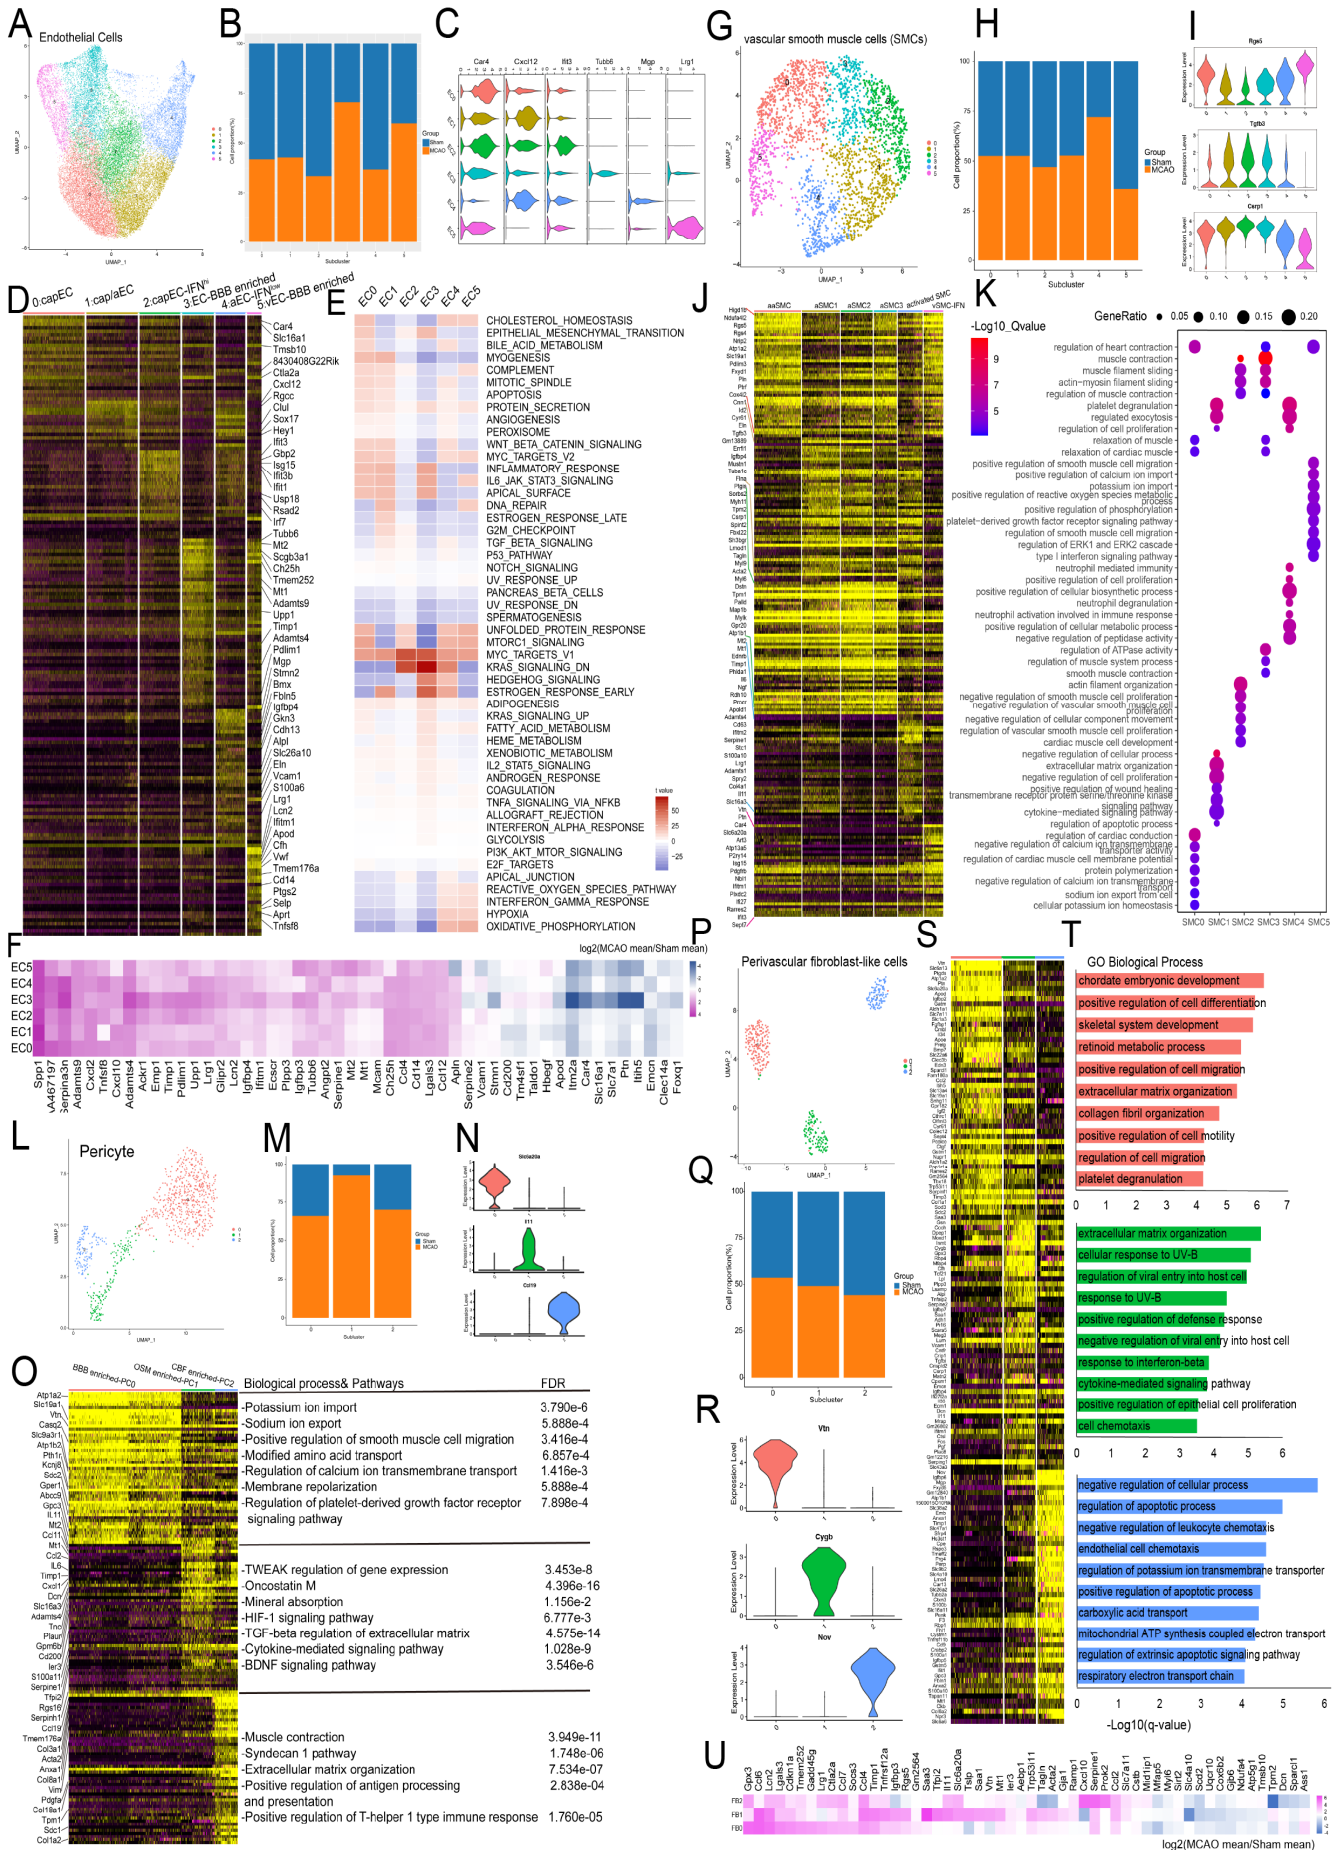

**Fig. S10. Gene expression alterations in the sub-clustering of vasculature lineage cells after stroke.** (A, G, L, P) UMAP representation of endothelial cells (ECs)(A), vascular mural cells (smooth muscle cells (SMCs)(G) and pericytes (PCs)(L)) and perivascular fibroblast-like cells (FBs)(P). (B, H, M, Q) Bar graphs representing proportion of each ECs(B), SMCs(H), PCs(M) and FBs(Q) subsets within each disease group. (C, I, N, R) Violin plot of the representative marker genes in each ECs(C), SMCs(I), PCs(N) and FBs(R) subsets. (D, J, O, S) Heatmap representing gene expression characteristics of the subtypes of ECs(D), SMCs(J), PCs (O, left panel) and FBs(S). (E) GSVA analysis in pathway activities among different ECs subclusters. (K, O, T) Gene Ontology analysis based on DEGs of each SMCs (K), PCs (O, right panel) and FBs(T)subclusters. Representative GO terms with Benjamini–Hochberg-corrected  $P < 0.05$  (one-sided Fisher’s exact test) are displayed. (F, U) Heatmap showing the log<sub>2</sub>FC in gene expression of the selected ECs (F) and FBs (U) subcluster-based DEGs between sham and MCAO group.



**Fig. S11. Differential gene expression patterns in other glia lineage cells and stem cells clusters.** (A, E, I) t-SNE projection of the astrocytes(A), oligodendrocytes(E) and neural progenitor cells(I) sub-clustering. (B, F, J) Bar graphs representing proportion of each ASCs(B), OLGs(F) and NPCs(J) subclusters within each disease group. (C, G, K) Heatmap representing gene expression characteristics of the subtypes of ASCs(C), OLGs(G) and NPCs(K). (D, H, L) Gene Ontology analysis of DEGs for each of the ASCs(D), OLGs (H) and NPCs(L)subclusters. Representative GO terms with Benjamini–Hochberg-corrected  $P < 0.05$  (one-sided Fisher’s exact test) are displayed.



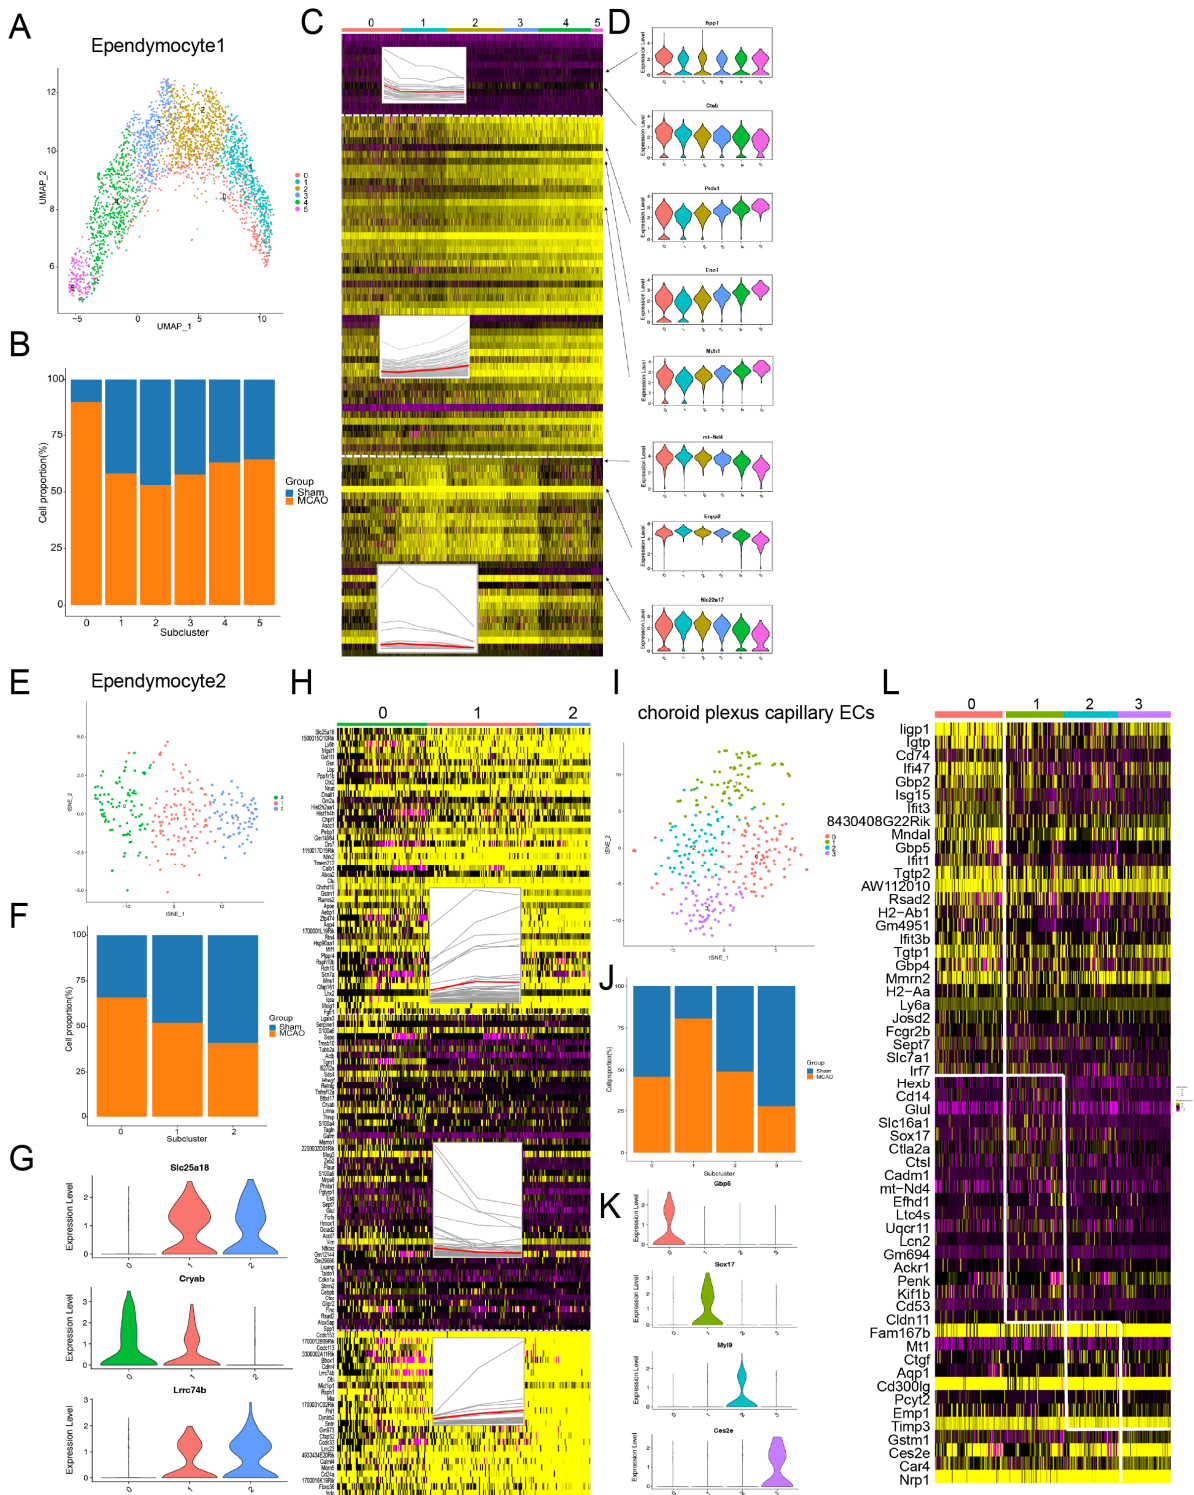

**Fig. S12. Gene expression alterations in choroid plexus endothelial cells and ependymal clusters after stroke.** (A) UMAP visualization of subclusters of secretory ependymal cells (EPC1). (E, I) t-SNE projection of the EPC2(E) and choroid plexus capillary ECs (CPCs) (I) sub-clustering. (B, F, J) Bar graphs representing proportion of each EPC1(B), EPC2(F) and CPCs (J) subtypes within each disease group. (D, G, K) Violin plot of the representative marker genes in each EPC1(D), EPC2(G) and CPCs(K) subtypes. (C, H, L) Heatmap representing gene expression characteristics of the subtypes of EPC1(C), EPC2(H) and CPCs(L).

**Table S1. Sequencing parameters for cells isolated from the sham and MCAO groups.**

|                                                | <b>Sham1</b> | <b>Sham2</b> | <b>Sham3</b> | <b>MCAO1</b> | <b>MCAO2</b> | <b>MCAO3</b> |
|------------------------------------------------|--------------|--------------|--------------|--------------|--------------|--------------|
| Estimated number of cells                      | 8771         | 8540         | 9980         | 11772        | 11361        | 8104         |
| Mean Reads per Cell                            | 107345       | 130357       | 121192       | 93621        | 90953        | 149331       |
| Median Genes per Cell                          | 1231         | 1257         | 1281         | 1396         | 1365         | 1554         |
| Valid Barcodes                                 | 94.9%        | 94.9%        | 95.5%        | 96.2%        | 96.1%        | 95.4%        |
| Sequencing Saturation                          | 94.1%        | 94.9%        | 94.7%        | 91.8%        | 91.9%        | 93.3%        |
| Q30 Bases in Barcode                           | 96.4%        | 96.4%        | 96.2%        | 96.8%        | 96.8%        | 96.8%        |
| Q30 Bases in RNA Read                          | 90.5%        | 90.5%        | 89.8%        | 91.0%        | 91.4%        | 92.0%        |
| Q30 Bases in UMI                               | 96.0%        | 96.0%        | 95.9%        | 96.5%        | 96.5%        | 96.5%        |
| Reads Mapped Confidently to Genome             | 90.9%        | 91.8%        | 92.1%        | 92.2%        | 92.8%        | 90.0%        |
| Reads Mapped Confidently to Intergenic Regions | 4.3%         | 4.1%         | 3.9%         | 3.4%         | 3.3%         | 5.3%         |
| Reads Mapped Confidently to Intronic Regions   | 19.3%        | 18.5%        | 18.4%        | 16.4%        | 16.1%        | 17.3%        |
| Reads Mapped Confidently to Exonic Regions     | 67.3%        | 69.2%        | 69.7%        | 72.4%        | 73.4%        | 67.3%        |
| Reads Mapped Confidently to Transcriptome      | 63.5%        | 65.3%        | 65.7%        | 68.6%        | 69.6%        | 63.6%        |
| Reads Mapped Antisense to Gene                 | 1.5%         | 1.5%         | 1.5%         | 1.7%         | 1.6%         | 1.5%         |

**Table S2. Top enriched pathways and process among DEGs between MCAO and sham groups of major cell types (P<0.05) and representative DEGs involved in the pathways and process.**

| Cell type        | No. DEGs | Top representative pathways and process                                                                                                                                      | Top representative DEGs                                                                    |
|------------------|----------|------------------------------------------------------------------------------------------------------------------------------------------------------------------------------|--------------------------------------------------------------------------------------------|
| Microglia        | 275      | Neutrophil chemotaxis/Apoptosis<br>Lysosome/Positive regulation of microglia cell migration                                                                                  | Up: Spp1,Lilrb4a,Cd72,Ccl7,Ccl12<br>Down: P2ry12,Siglech,Gpr34,Selplg,Hpgd                 |
| Astrocyte        | 34       | Cellular responses to stress/Signal Transduction<br>Respiratory electron transport                                                                                           | Up: Ccl4,Cdkn1a,Gfap,AY036118,Vim<br>Down: Dbp, Gria2, Ntm, Itm2a, Appl2                   |
| Endothelial cell | 101      | Cellular response to chemical stimulus/Regulation of cell death<br>Anion transport/Transport of small molecules                                                              | Up: Ctla2a, Plat, Lrg1, Lcn2, Tmem252<br>Down: Rps27rt, Cxcl12, Spock2, Ifit3, Itm2a       |
| Oligodendrocyte  | 80       | Cytokine-mediated signaling pathway/Regulation of neuron apoptotic process<br>Regulation of glial cell differentiation/ Negative regulation of neuron projection development | Up: Serpina3n, Tma16, Gpd1, Phactr3, Klk6<br>Down: Hebp1,1700047M11Rik, Lpar1, Omg, Hs3st1 |
| Ependymocyte     | 35       | Response to steroid hormone/ Regulation of ion transport<br>Oxidative phosphorylation/Ribonucleoprotein complex biogenesis                                                   | Up: Spp1,Ccl4,Ccl12,AY036118,Mt2<br>Down: Defb11,Hist2h2aa1,Usp50,Ifi2712a, Sostdc1        |
| Pericyte         | 26       | Regulation of secretion/Response to peptide<br>Transport of small molecules                                                                                                  | Up: Ednrb,Il11,Timp1,Saa3,Ccl11<br>Down: Dbp,Itm2a,Cxcl12,Pltp,Tsc22d1                     |
| SMC              | 59       | Cellular response to chemical stimulus/Cytokine-mediated signaling pathway<br>Regulation of calcium ion transmembrane transport/Relaxation of muscle                         | Up: Ifitm1,Ccl4,Cdkn1a,Sdc4,Ras111a<br>Down: Fbxl22,Pln,Lbh,Crim1,Myh11                    |
| CAM              | 135      | Toll-like receptor cascades/Chemokine receptor binding<br>Vasodilation /Amyloid-beta binding                                                                                 | Up: Arg1,Saa3,Cxcl2,Msr1,Ccl6<br>Down: Hist4h4,Hpgd,Maf,Lst1,Clec10a                       |
| Neutrophil       | 67       | Neutrophil degranulation/IL-1 signaling pathway                                                                                                                              | Up: Cxcl3,Ccl2,Cxcl2,Marcks11,Hcar2                                                        |



|            |     |                                                                                                                |                                                                              |
|------------|-----|----------------------------------------------------------------------------------------------------------------|------------------------------------------------------------------------------|
|            |     | regulation of peptidase activity                                                                               | Down: Ltf,Camp,Cd177,Ngp,Ly6g                                                |
| MdC        | 153 | Myeloid leukocyte migration/Acute-phase response<br>Cellular extravasation/Integrin-mediated signaling pathway | Up: Arg1,Thbs1,Clec4n,Cxcl3,Ccl7<br>Down: Rnase6,Ear2                        |
| DC         | 25  | Cell chemotaxis/Positive regulation of defense response                                                        | Up: Ifitm1,Ccr7,Fabp5,Pfcp,Ccl22<br>Down: Rpl9-ps6,Clec4b1,Cd209a,Mgl2,Tnip3 |
| Lymphocyte | 26  | Leukocyte apoptotic process/Metalloprotease DUBs                                                               | Up: Ccl5,Dusp2,Ccl3,Gzma,Lck<br>Down: H2-Aa,Lyz2,Cd74,Ly6d,Xcl1              |
| FB         | 14  | Myoblast differentiation/Structural constituent of ribosome                                                    | Up: Angptl4,Ccl4<br>Down: Dbp,Ifi2712a,Nme2                                  |

DEGs listed as up displayed increased expression in MCAO and DEGs listed as down showed decreased expression in MCAO compared with Sham. The gene enrichment analysis was performed based on ontology sources including KEGG Pathway, GO Biological Processes, Molecular Function and Reactome Gene Sets. P-values were adjusted using the Benjamini-Hochberg correction for multiple tests.

**Table S3. Top 50 differentially expressed genes per cluster among all detected brain cells.**

| EC      | MG      | ASC     | EPC           | SMC      | MdC      | CAM      | OLG      | PC       | NEUT   | FB       | LYM       | CPC      | NPC       |
|---------|---------|---------|---------------|----------|----------|----------|----------|----------|--------|----------|-----------|----------|-----------|
| Foxq1   | P2ry12  | Ntm     | Cox8b         | Tagln    | Arg1     | Lyve1    | Kcna1    | Ccl11    | Retnlg | Scgb1c1  | Xcl1      | Plvap    | Npy       |
| Abcb1a  | Gpr34   | Cldn10  | Sostdc1       | Pln      | Chil3    | Mrc1     | Plp1     | Il11     | Gm5483 | Inmt     | Gzmb      | Plpp1    | Fabp7     |
| Slco1a4 | Siglech | Btbd17  | Calml4        | Map3k7c1 | Sirpb1c  | Ms4a7    | Mog      | Kcnj8    | Il1f9  | Lum      | Gzma      | Igfbp3   | Ptn       |
| Gm694   | Hexb    | Aldoc   | Ttr           | Acta2    | Plac8    | Pf4      | Ernm     | Ccl19    | S100a9 | Dcn      | Cd3g      | Rgcc     | Apod      |
| Itm2a   | Tmem119 | Nkain4  | Folr1         | Lmod1    | Ly6c2    | F13a1    | Opalin   | Atp13a5  | Mmp9   | Coch     | Nkg7      | Rbp7     | Ccnd2     |
| Sox17   | Olfml3  | Mmd2    | Kcnj13        | Cnn1     | Ccr2     | Saa3     | Cldn11   | Art3     | Wfdc21 | Colla1   | Cd3d      | Nrp1     | Ncam1     |
| Cldn5   | Gpr84   | Scg3    | 1500015O10Rik | Myh11    | Ms4a4c   | Gpx3     | Stmn4    | Vtn      | S100a8 | Wfdc18   | Ptprcap   | Cd24a    | Sox11     |
| Degs2   | Crybb1  | Acsbg1  | Pcp4          | Tpm2     | AA467197 | Mgl2     | Nkx6-2   | P2ry14   | Hba-a1 | Slc6a13  | Ly6d      | Cd300lg  | Nnat      |
| Scgb3a1 | Lag3    | Aqp4    | Hemk1         | My19     | S100a4   | Apoe     | Tmem151a | Higd1b   | Hbb-bt | Efemp1   | Ms4a4b    | Gpihbp1  | Tubb3     |
| Sdpr    | Ly86    | Timp4   | Enpp2         | Aspn     | Thbs1    | Ccl7     | Hapln2   | Meg3     | Hba-a2 | Islr     | Ccl5      | Thrsp    | Gsn       |
| Ocln    | Selplg  | Gpr3711 | Ppp1r1b       | Des      | Clec4e   | Maf      | Mag      | Il34     | Mmp8   | Nov      | Klrk1     | Slc43a3  | Frzb      |
| Tmem252 | Lpcat2  | Gjb6    | Spint2        | Mylk     | Ccl6     | Clec4n   | Gjb1     | Slc6a20a | Hbb-bs | Colla2   | Ltb       | Plpp3    | Stmn1     |
| Vwa1    | Cx3cr1  | Fabp7   | Rdh5          | Sneg     | Lyz2     | Lyz2     | Aspa     | Cox4i2   | Cxcr2  | Igfbp5   | Klrd1     | Emcn     | Rtn1      |
| Flt1    | Trem2   | Agt     | Chchd10       | Mustn1   | Mcomp1   | Stab1    | Pex5l    | Sod3     | Ltf    | Serpinf1 | Gimap4    | Fam167b  | Hmgn2     |
| Ly6c1   | Ccl4    | Hes5    | Igfbp2        | Crispld2 | Clec4n   | Ms4a6c   | Sez6l2   | Ndufa4l2 | G0s2   | Igfbp6   | Sept1     | Prss23   | Igfbp11   |
| Emcn    | Ptgs1   | Cxcl14  | Slc22a17      | Gm13861  | Cfp      | Ms4a6b   | Mobp     | Pdgfrb   | Ngp    | Mgp      | Hcst      | Timp3    | Meg3      |
| Kank3   | Lpl     | Cspg5   | Rbp1          | Rgs4     | Clec4d   | Lst1     | Klk6     | Rgs5     | Hdc    | Serping1 | AW112010  | Ramp3    | Lmo4      |
| Adgrl4  | Syng1   | Ntsr2   | Fxyd1         | Filip11  | Napsa    | Dab2     | Tmeff2   | Gper1    | Camp   | Pcolce   | H2-Q7     | Plscr2   | Hist1h2ap |
| Cxcl12  | Fcrls   | F3      | Pcolce        | Crip1    | Hp       | Ifi2712a | Epb4113  | Lhfp     | Slpi   | Gsn      | Dusp2     | Cd200    | Pfn2      |
| Paqr5   | Lair1   | Pantr1  | Mcee          | Cald1    | Camp     | Adgre1   | Tnfaip6  | Fstl1    | Fpr1   | Apod     | H2-DMb2   | AW112010 | Gpm6b     |
| Ctla2a  | Ccl3    | Lcat    | Gpx8          | Gm13889  | Slfn1    | Fcgr2b   | Olig1    | Slc19a1  | Il1r2  | Slc6a20a | Rac2      | Mfap2    | Apoe      |
| Abcg2   | Csflr   | Lsamp   | Mdh1          | Perp     | Cxcl3    | H2-Eb1   | Gpr37    | Nbl1     | Ifitm6 | Nupr1    | Hist1h2ap | Plscr1   | Meis2     |
| Ly6a    | Ccl12   | Gria2   | Ldhb          | Gja4     | Ngp      | Hmox1    | Cnp      | Ifitm1   | Trem1  | Vtn      | Lsp1      | Clec14a  | Mdk       |
| Pecam1  | Rgs10   | Mlc1    | Ifi27         | Map1b    | Ifitm6   | Ms4a6d   | Mbp      | Ednrb    | Wfdc17 | Bgn      | Cd52      | Coll13a1 | S100b     |
| Egfl7   | C1qc    | Serg1   | Atp5g1        | Tpm1     | Tgfb1    | Fpr1     | Tubb3    | Rgs4     | Cxcl3  | Il34     | Hmgb2     | Iigp1    | Dlx2      |
| Ramp2   | C1qb    | Ptprz1  | Atp1b1        | Ndufa4l2 | S100a6   | Tgfb1    | Aplp1    | Bgn      | Il1b   | Timp1    | S100a10   | Esm1     | Plp1      |
| Ptprb   | Lgmn    | Dcl1    | Mt3           | Flna     | Plbd1    | Ccr1     | Tubb4a   | Timp1    | Hp     | Slc7a11  | Ly6c2     | Car8     | Tubb2b    |

|          |         |         |               |          |          |          |         |          |         |         |         |         |               |
|----------|---------|---------|---------------|----------|----------|----------|---------|----------|---------|---------|---------|---------|---------------|
| Pglyrp1  | Mafb    | Slc1a2  | Ndufa1        | Gper1    | Slpi     | Cd74     | Ptgds   | Gm13889  | Cxcl2   | Igfbp4  | S100a4  | Gngt2   | Matn4         |
| Mpzl1    | C1qa    | Ttyh1   | Dbi           | Rgs5     | Il1b     | Gmfg     | Mapt    | Cald1    | Mxd1    | Fstl1   | Gmfg    | Igfbp7  | Tuba1a        |
| Slc2a1   | Ctss    | Bcan    | Ndufa11       | Serping1 | Cxcl2    | Snx2     | Tspan2  | Rarres2  | Chil1   | Slc38a2 | Lgals1  | Tm4sf1  | Fxyd6         |
| Adgrf5   | C3ar1   | Slc1a3  | Usmg5         | Bgn      | Osm      | Cfp      | Il33    | Gja4     | Anxa1   | Nbl1    | Coro1a  | Meox1   | Stmn2         |
| Lsr      | Bin2    | Gm3764  | Pebp1         | Nbl1     | Lgals3   | Ptpn18   | Phactr3 | Slc6a13  | Clec4e  | F3      | Ptpn18  | Mgll    | 6330403K07Rik |
| Sgms1    | Vsir    | Gpm6a   | Ndufv3        | Csrp1    | Trem1    | Lgals1   | Kctd13  | Gm13861  | Mcemp1  | Igfbp2  | Cd74    | Ifitm2  | Fxyd1         |
| Wfdc1    | Rgs1    | Htra1   | 2010107E04Rik | Fstl1    | Ccr1     | Marcks11 | Dbn1d2  | Sdc2     | Slfn1   | Ptgds   | Limd2   | Jam3    | Brinp3        |
| Slc22a8  | Abi3    | Tspan7  | Cox7b         | Lhfp     | S100a10  | H2-Aa    | Etv1    | Gpx8     | Ltb     | Rbp1    | Arhgdib | Mmrn2   | Sox4          |
| Slc7a5   | Irf8    | Gfap    | Uqcr10        | Cox4i2   | Cd52     | H2-Ab1   | Fez1    | Phlda1   | Clec4d  | Cp      | Ccr2    | Tgtp2   | Scrg1         |
| Car4     | Cd14    | Plpp3   | Hist1h2bc     | Higd1b   | Wfdc17   | Ctsc     | Gpd1    | Dcn      | Ifitm1  | Itih5   | H2-Eb1  | Gimap4  | Slc4a4        |
| Slc9a3r2 | Sirpa   | Fbxo2   | Rarres2       | Errfi1   | Lsp1     | Pla2g7   | Pcdh9   | Ptn      | Lcn2    | Ccl19   | H2-Aa   | Mfge8   | Qpct          |
| Esam     | Aif1    | Kcnk1   | Fam213a       | Ppp1r14a | Bcl2a1d  | Ccl9     | Tmod2   | Lum      | Msrbl   | Ptn     | S100a6  | Lmcd1   | Marcks11      |
| Acvr11   | Cd68    | Ntrk2   | Arl6ip1       | Pdgfa    | Ltf      | Cited2   | Trf     | Serping1 | Cd24a   | Lmo4    | Cend2   | Tgtp1   | Dlx1          |
| Spock2   | Fcgr3   | Tubb2b  | Cox6c         | Sdc2     | Anxa1    | Fcer1g   | Gpm6b   | Perp     | Ccl2    | Plpp3   | Cd209a  | Exoc3l2 | Sp9           |
| Ablim1   | Rgs2    | Slc6a1  | Gpx4          | Il34     | Ms4a6c   | Ccl2     | Cmtm5   | G0s2     | Ccr1    | Gpx8    | Tmsb10  | Mndal   | Dbi           |
| Cd200    | Ctsd    | Gja1    | Hint2         | Pdgfrb   | Msrbl    | Wfdc17   | Cryab   | Aspn     | Slc7a11 | Tmeff2  | Napsa   | Tspan15 | Cmtm5         |
| Gimap6   | Cst3    | Acsl3   | Cox8a         | Mob2     | Pim1     | Pid1     | Cpox    | Colla2   | S100a11 | Lhfp    | H2-Ab1  | Igtp    | Mgst1         |
| Id1      | Marcks  | Slc7a10 | Ndufa4        | Actn1    | Ifi27l2a | Ccl6     | Tppp3   | Atp1a2   | Rac2    | Cd302   | Hn1     | Gm12216 | Map1b         |
| Tsc22d1  | Abhd12  | Atp1b2  | Ndufc1        | Ppp1r12a | Ccl9     | Aif1     | Qdpr    | Sept4    | Gmfg    | Lrp1    | Lcp1    | Col4a1  | Nrxn3         |
| Eng      | Lptm5   | Clu     | Uqcr11        | Dstn     | Lst1     | Ednrb    | Shisa4  | Colla1   | S100a6  | Perp    | Shisa5  | Ces2e   | Tmod2         |
| Igflr    | Ltc4s   | Thrsp   | Slc6a20a      | Ptrf     | Gsr      | C1qa     | Sept4   | Cp       | Il1rn   | Atp1a2  | Rps27   | Ifi203  | Tiam2         |
| Bsg      | C5ar1   | Hepacam | Atp5g3        | Ptp4a3   | Pid1     | Clec4d   | Syt11   | Adap2os  | Hest    | Phlda1  | Rpsa    | Tnfaip2 | Hsph1         |
| Cd34     | Unc93b1 | Gstm5   | Kcnk1         | Slc19a1  | Emp3     | Hest     | Desi1   | Eva1b    | Lrg1    | Gjb6    | Rps15a  | Lrg1    | Gm17750       |
